# Supplementary material for: Peroxisome Proliferator Activated Receptor Agonists Modulate Transposable Element Expression in Brain and Liver
Source: Front Mol Neurosci. 2018 Sep 19;11:331. doi: 10.3389/fnmol.2018.00331 (PMC6156381; doi:10.3389/fnmol.2018.00331)
Supplement: Supplementary file 5 [file Table_5.XLSX]

## Sheet: 11.100.99_AMY_Merged_Module_enr
color	astrocyte	beza	beza down regulated	beza up regulated	DNA	Epigenetic Genes	feno	feno down regulated	feno up regulated	GABA	GLUT	LINE	LTR	microglia	neuron	oligo	SINE	tesa	tesa down regulated	tesa up regulated
green	0.999998	0.999961	1	1	0.582877	0.00017294	1	1	1	0.188122	0.50112	1.27705e-19	0.00314386	0.98844	0.000315732	0.949768	9.58288e-27	2.19772e-12	1.74937e-71	1
skyblue	0.984768	0.2609	0.00448335	1	1	0.183774	0.640275	0.999999	0.00117997	0.767442	1	0.0647594	0.00229652	1	0.856584	1	1.11719e-05	0.122939	0.995785	0.00117932
skyblue3	0.969671	0.800298	0.906377	0.977483	1	0.630538	0.937711	0.968072	0.696242	0.710183	0.817843	0.242423	1	1	0.286022	0.866834	0.00177972	0.999465	0.921268	1
plum1	0.398248	0.0239121	0.00011712	0.999951	1	0.605336	0.997866	0.999659	0.860981	1	1	0.594819	0.0724767	1	0.381813	0.847798	0.00628512	0.793676	0.980411	0.391913
violet	0.907898	0.719305	0.454625	0.999715	1	0.201604	0.01449	0.902115	0.000164507	1	0.743705	0.436049	1	0.508685	0.73733	0.957752	0.137295	0.966678	0.89034	0.930044
saddlebrown	0.994362	0.35372	0.00171081	1	0.315746	0.15138	0.983987	0.979433	0.859344	0.925192	0.869199	0.873892	0.0706808	0.66398	0.99999	0.922233	0.325454	0.937953	0.992461	0.575712
darkmagenta	0.36619	0.997983	0.99827	0.999567	1	1	0.526021	0.00114128	0.999984	0.7626	0.861543	0.313987	0.707468	0.359288	0.426252	0.903762	0.347008	0.671329	0.10572	0.988015
grey60	0.111329	0.000217498	1.57386e-11	1	1	0.735242	0.00303582	1	1.20212e-13	0.854193	0.998653	0.89092	0.374574	0.238346	0.986406	0.645907	0.382213	0.964253	0.999987	0.257343
white	0.286203	0.0479206	0.710536	0.749168	1	0.677656	6.9149e-05	8.66353e-05	0.119877	0.946297	0.000175853	0.408364	0.454014	0.924508	0.00177436	0.0977388	0.421397	0.00147267	2.49581e-09	0.996249
lightgreen	0.773018	0.000397535	0.779566	0.235106	0.46444	0.461719	0.871806	0.995237	0.252336	0.436206	0.712235	0.852414	0.15457	0.979725	0.424508	0.923942	0.422915	0.818061	0.697914	0.799042
lightyellow	0.875402	2.52199e-05	0.471832	0.148	1	0.403393	0.00584606	0.587435	0.00031023	0.00232311	0.311283	0.0959032	0.854022	1	0.155518	0.474309	0.519689	0.449224	0.000201106	0.999985
lightcyan	0.717152	4.29466e-06	8.12681e-17	1	1	0.975064	0.999977	0.999969	0.968856	0.165349	0.986492	0.895489	0.5841	0.3672	0.978062	1.76616e-60	0.548831	0.999645	0.894176	0.999807
darkgrey	0.360004	0.000424003	4.7652e-08	0.999999	1	0.358951	0.986285	0.128999	0.999996	0.521265	0.762294	0.0694444	0.373388	0.650063	0.764483	0.998032	0.61223	0.999943	0.988219	0.999327
tan	0.323622	0.0355618	0.0203673	0.99996	0.0541668	0.355936	0.103161	0.868343	0.00701014	0.561181	0.990154	0.851365	0.745471	0.0860752	0.702433	0.764951	0.634438	0.782216	0.999516	0.0808913
purple	0.396969	0.71642	0.292362	1	0.252581	0.787502	0.999876	0.997755	0.984259	0.498465	0.953267	0.900782	0.500868	0.84411	0.999509	0.91805	0.635859	0.99748	0.999993	0.623287
darkgreen	0.197338	3.82303e-08	3.35806e-20	1	1	0.607247	0.98841	0.999979	0.350802	0.980678	0.971242	0.95124	0.624371	0.670234	0.954083	0.60363	0.6438	0.898253	0.999188	0.263029
paleturquoise	0.789641	0.154421	0.695445	0.878274	0.288325	0.293447	0.999636	0.92074	0.999684	0.68429	0.0434416	0.843734	1	0.617923	0.145521	0.531399	0.854615	0.0630835	0.67798	0.0158243
midnightblue	0.354757	9.41799e-06	1.46208e-09	0.999999	1	0.447947	0.760511	0.0196573	0.999665	0.913462	0.762964	0.79746	0.835298	0.714722	0.967204	0.663044	0.890947	0.404221	0.743875	0.122205
turquoise	2.35199e-08	0.000377469	0.99998	0.573666	0.909861	0.926013	0.999945	0.999969	0.869573	0.832363	0.997708	0.972187	0.708874	0.0127996	0.999998	0.649492	0.894519	0.905923	0.999953	0.0890941
magenta	0.95494	4.05774e-06	0.859078	0.0699731	0.650007	0.662516	0.0024153	0.98768	9.83579e-09	0.920971	0.74178	0.922534	0.562719	0.416605	0.757582	0.996696	0.894574	0.67411	0.999544	0.0338362
pink	0.922117	0.787931	1	0.982744	1	0.240224	1	0.999999	0.998004	0.606326	0.991739	0.997218	0.949522	0.6367	1	0.957004	0.908705	0.999336	0.999996	0.757699
royalblue	0.220838	8.20071e-12	0.999927	1.75888e-10	1	0.79558	0.191949	0.000346668	0.996818	0.882966	1.13209e-09	0.955831	0.965054	0.221193	1.83565e-11	0.0738555	0.924545	0.0150512	0.998466	4.76643e-06
darkolivegreen	0.604419	0.197583	0.0162581	0.998596	1	0.446939	3.48177e-07	1.09696e-16	0.99556	0.849923	0.0446393	0.768637	0.792714	1	0.714049	0.0849979	0.932935	0.00493205	0.000187381	0.587257
orange	0.069199	0.0136583	0.00291002	0.99956	1	0.023687	2.2365e-21	1	2.72729e-45	0.00285789	0.714968	0.945198	0.371244	0.821421	0.0198586	0.119621	0.9697	7.32116e-07	0.999995	4.82642e-16
darkturquoise	0.473217	0.00922412	0.00176566	0.999657	1	0.354709	0.596319	0.122008	0.954758	0.172173	0.406963	0.792472	0.0957788	0.645926	0.0932707	0.859842	0.972137	0.234995	0.374427	0.291324
darkred	0.42766	0.000296644	0.989874	0.0203434	0.42698	0.791166	0.000307115	1	1.0216e-14	0.29431	0.375731	0.952108	0.961877	0.396463	1.66977e-08	0.533881	0.97544	9.13583e-09	0.999948	4.12609e-18
greenyellow	0.0990498	0.99424	0.999899	0.999993	0.617606	0.856078	8.06506e-141	1	4.80876e-234	4.02019e-07	0.183883	0.760282	0.996448	0.968196	3.88747e-19	0.0555276	0.986315	1.38437e-73	1	7.01439e-119
black	0.991212	0.969312	0.943709	1	0.597744	0.479358	0.205611	1	6.19998e-11	0.991777	1	0.995308	0.898995	0.6075	1	0.981528	0.990381	0.995302	1	0.0341125
blue	0.415593	0.336379	0.00072272	1	0.668075	0.887281	0.706826	6.04991e-08	1	0.916277	0.648856	0.685176	0.335325	0.938896	0.120244	0.971905	0.990695	0.999842	0.745279	0.999992
darkorange	0.83737	2.78344e-05	0.710931	0.0426821	1	0.936787	0.537052	0.999995	0.00109842	0.855205	0.846197	0.930791	1	0.349956	0.927607	0.914719	0.992773	0.000212841	0.996857	3.27258e-09
red	0.292061	0.0412649	7.68643e-05	1	0.173575	0.893455	7.7254e-18	2.49806e-70	1	0.102116	2.15195e-05	0.986334	0.610731	0.754652	1.37568e-08	0.497317	0.99663	0.0535624	7.81977e-14	1
yellow	0.868225	0.999866	0.997953	1	0.565862	0.587597	1.85268e-25	3.67954e-77	1	0.00878309	0.000683387	0.694861	0.995831	0.585564	0.0496324	0.89187	0.99997	0.999981	0.648587	1
salmon	0.000247756	0.225422	2.1148e-06	1	0.0522074	0.593411	1.80609e-27	1.45876e-70	1	0.141179	1.74919e-14	0.990912	0.377321	0.0154729	9.56662e-09	0.0739819	1	1.75778e-11	2.00334e-34	1
yellowgreen	0.975135	0.999987	0.996938	1	1	0.28027	0.26227	0.00225325	0.997148	0.72988	0.834645	0.629256	0.655869	0.685404	0.0559253	0.88125	1	0.998069	0.815229	1
sienna3	0.0204046	0.791762	0.970983	0.941658	1	0.627038	0.932694	0.422791	0.995234	0.343567	0.814882	1	1	1.25098e-06	1	0.864267	1	0.917199	1	0.446918

## Sheet: 14.150.99_PFC_Merged_Module_enr
color	astrocyte	beza	beza down regulated	beza up regulated	DNA	Epigenetic Genes	feno	feno down regulated	feno up regulated	GABA	GLUT	LINE	LTR	microglia	neuron	oligo	SINE	tesa	tesa down regulated	tesa up regulated
darkorange	0.999282	9.56948e-21	0.990824	1.10722e-18	0.317398	0.33574	1.50344e-57	1	2.80299e-119	0.736137	0.696732	0.0497958	0.0528786	1	0.969345	0.788656	2.49493e-12	0.999112	0.883159	0.999803
tan	0.999994	0.953542	0.990221	1	0.879463	0.000112187	1.89229e-32	1	7.99001e-190	0.68881	0.00198321	4.04085e-18	0.00331795	0.999457	5.55784e-10	0.853177	2.59866e-12	2.83223e-106	1.92401e-227	1
brown	0.917836	0.532541	0.999938	0.981229	1	0.7233	1	1	0.0448704	0.0322299	0.364695	0.823642	0.43887	0.698495	0.222963	0.860509	0.318012	1.59245e-11	0.999849	5.52558e-32
darkmagenta	0.0195363	0.827272	0.998724	0.967374	1	0.592655	1	1	0.992736	0.000141134	0.443378	0.0387826	0.831856	0.439331	0.000292371	0.0477603	0.518906	0.993017	0.999969	0.439856
darkolivegreen	3.78167e-05	0.995295	0.997551	0.998699	1	1	0.998203	1	0.0570375	0.275666	0.460928	1	0.794788	0.00109851	0.986344	0.334749	0.541533	0.999578	0.99947	0.949244
midnightblue	0.994824	0.00302867	0.979364	0.0635999	0.48688	0.146539	0.0143323	0.999999	9.96505e-17	0.990019	0.428676	0.675688	0.686914	0.982004	0.0772934	0.733491	0.614024	0.737905	0.995435	0.0559419
darkturquoise	0.442453	0.999939	0.999987	1	0.729399	0.683029	1	1	0.0358487	0.801055	0.118326	0.566235	0.700633	0.930188	0.091346	0.996828	0.846791	0.0162395	0.999997	7.85813e-13
skyblue	0.959771	0.0801371	0.9965	0.179405	1	0.85041	1	1	0.676136	0.69179	0.231345	1	1	0.345062	0.807061	0.73798	0.852307	0.287737	0.48727	0.280261
darkgrey	0.563668	0.997097	0.923803	0.999998	1	0.873985	0.0208204	1.63653e-09	1	0.482653	3.05795e-06	1	1	0.395746	9.03127e-17	0.0240277	0.912745	0.999987	0.98551	0.999973
lightcyan	0.933226	0.000568771	0.964698	0.788256	0.697934	0.580213	0.999252	1	4.78005e-05	0.393278	0.746886	0.999758	0.286335	0.387522	0.99117	0.167813	0.953342	0.0460388	4.33145e-05	0.961785
lightyellow	0.00212436	0.999329	0.91802	1	1	1	0.133393	2.17226e-08	1	6.93151e-06	0.947417	0.158407	0.789788	0.0278087	0.131106	1.29129e-42	0.968983	0.999758	0.849549	0.999994
orange	0.894694	0.92295	0.441604	0.999997	1	0.663859	0.189118	7.23608e-06	0.999997	0.0683837	0.559218	1	0.179817	0.921041	0.576383	0.311166	0.982432	0.958968	0.831993	0.946628
steelblue	0.990896	0.40941	0.00512917	1	0.465048	0.428499	1.75737e-11	5.52269e-30	1	0.249648	0.130443	0.408441	0.048623	0.887648	0.0413734	0.142283	0.983456	0.019772	0.963722	2.29788e-05
darkgreen	0.70855	0.00322035	0.00158714	0.969201	0.363984	0.685498	0.74556	0.0653602	0.994736	0.180009	0.229727	1	1	0.485512	0.0023091	0.707751	0.987641	2.26247e-07	3.37086e-11	0.711286
darkred	0.00929212	0.97966	0.0656219	1	0.0567141	0.206863	9.6979e-06	8.67765e-36	1	0.492573	0.857471	0.982812	0.937803	0.757022	0.7261	0.658769	0.987845	0.991919	0.999412	0.561487
purple	0.00822155	0.792657	0.00160075	1	0.591276	0.678712	1.26121e-11	8.78449e-51	1	0.508064	0.983782	0.999712	0.981301	0.0510102	0.999644	0.739562	0.992419	0.521461	0.000167789	0.999953
cyan	0.700441	6.20352e-48	9.49283e-110	1	1	0.555894	1.01625e-288	0	1	0.909915	0.942263	0.988751	0.996761	0.58792	0.981585	0.90654	0.997065	0.997386	0.321692	0.999997
turquoise	0.886386	0.995552	0.998574	1	0.270904	0.850449	0.548361	1	9.48509e-25	0.439097	0.000596396	0.73952	0.925659	0.740018	0.00047269	0.749864	0.999982	0.111858	0.999197	2.71143e-06

## Sheet: 7.100.995_LIVER_Module_enrichme
color	beza	beza down regulated	beza up regulated	DNA	Epigenetic Genes	feno	feno down regulated	feno up regulated	hepatocyte	HSC	kupffer	LINE	LTR	SINE	tesa	tesa down regulated	tesa up regulated
darkturquoise	0.443564	0.513844	0.99996	1	0.810803	1	0.999357	0.999986	1	1	1	7.33951e-06	0.74573	1	1	0.999996	1
green	3.7656e-58	2.26026e-95	1	1	0.0026424	0.41487	3.51848e-15	1	0.994094	1	0.680364	1.80154e-05	0.00740067	5.32963e-12	0.0163118	1.47371e-32	1
darkgrey	0.200538	0.0717249	0.999991	1	0.481812	0.0155178	0.032108	0.320274	0.909975	1	1	0.00032017	0.382312	0.92799	4.25345e-05	0.00309708	0.0635062
darkorange	0.999737	0.995804	1	1	1	1	0.998075	0.999975	0.818273	1	1	0.0133678	1	0.550526	1	1	1
lightcyan	2.42136e-06	3.43222e-08	1	0.344498	0.774212	0.914558	0.0581631	0.99992	0.920748	1	1	0.0887069	0.913788	0.104496	1	1	0.999998
brown	0.614368	0.403962	1	0.383155	0.403109	0.99999	0.862957	0.999989	0.771932	0.34048	0.820611	0.126513	0.496739	0.640588	0.441013	0.00400746	0.985606
black	0.0954824	0.314453	1	1	0.312675	0.846675	0.31555	0.969296	0.968028	0.468137	1	0.327498	0.0157031	0.490445	0.99995	0.985871	0.980794
darkgreen	1.18646e-45	8.35405e-15	2.99726e-06	1	0.831658	1.08802e-22	3.27953e-06	7.378e-10	0.927689	1	1	0.481712	0.811549	0.407351	1	1	0.999379
royalblue	1	0.999961	1	0.281403	0.676198	1	1	1	0.968531	1	1	0.555582	0.853046	0.72249	1	1	0.999616
yellow	0.719923	0.382686	1	1	0.490625	0.998136	0.360269	0.999917	0.968802	0.598322	0.346212	0.655295	0.824147	0.559366	1	1	1
grey60	1	0.999987	1	1	1	0.999748	1	0.0124756	0.985469	1	1	0.674475	1	0.991003	0.998988	1	0.00192045
midnightblue	0.00789383	0.106299	0.999963	1	0.958027	0.714354	0.465474	0.74784	0.99067	1	1	0.73268	0.493168	0.763974	1	0.999943	0.999995
cyan	0.998706	0.976801	1	1	0.834999	1	0.999991	1	1	0.354231	1	0.748498	0.75972	0.287236	1	1	1
blue	1.19429e-07	0.0622595	1	0.246345	0.0348544	0.935254	0.65016	0.842049	0.518385	1	0.154771	0.76804	0.544448	0.40159	1.65662e-69	7.5917e-31	7.76772e-16
darkred	0.0247088	0.366023	0.98875	0.260932	0.0180774	0.000990587	0.218621	0.000713855	0.0869084	0.246183	1	0.820016	0.520214	0.255316	4.14428e-27	2.20795e-07	8.46257e-10
greenyellow	0.998015	0.773068	1	0.11016	0.75866	0.999999	0.472219	1	0.223217	0.416314	1	0.836165	0.643863	0.95882	1	0.953363	1
purple	0.0727124	0.590282	0.999989	1	0.18521	0.316341	0.957141	0.00768351	0.924426	1	1	0.837221	0.0179771	0.989643	1	1	1
magenta	0.0172815	0.00367739	1	0.440285	0.566224	0.999968	0.999985	0.689945	0.997508	1	1	0.838271	0.847463	0.474864	1	1	0.999997
lightyellow	0.999982	0.965934	1	1	1	1	0.999999	1	0.891464	1	1	0.871331	0.34325	0.983985	1	1	1
lightgreen	0.812912	0.92557	1	0.315676	0.748068	1	0.99811	0.99999	0.981291	1	1	0.883676	0.889333	0.620546	0.999916	0.959178	0.996545
salmon	0.000845498	0.0634414	0.999837	1	0.854185	0.318649	0.800596	0.0770811	0.553462	0.368034	1	0.941235	0.944971	0.200289	9.30369e-06	0.0518248	0.000549724
red	0.140968	0.996388	0.999997	0.603612	0.597521	0.790682	0.989565	0.075945	0.902235	0.577586	0.694331	0.966477	0.605776	0.893589	1.0911e-84	4.35625e-14	2.75984e-34
turquoise	2.60262e-05	0.0117867	1	0.369254	0.185538	0	4.14657e-111	6.92451e-155	2.2399e-15	0.503201	0.994221	0.99994	0.813342	0.998589	0	5.93146e-250	4.52716e-226
orange	0.274365	0.798805	0.977715	1	0.675345	0.00808846	0.639659	0.000627129	0.489792	1	1	1	0.616963	1	1	1	1
pink	1.12489e-26	4.86604e-07	0.016309	1	0.963108	4.7397e-101	2.43006e-10	3.63319e-49	1.10419e-08	0.068901	0.455238	1	0.968398	0.903787	3.24816e-77	9.71669e-07	4.78382e-37
skyblue	0.275783	0.845141	0.964935	1	0.291039	0.109445	0.640869	0.0277185	0.797342	1	1	1	0.589943	0.827371	0.000527137	0.0641051	0.0104447
tan	1	1	1	0.418113	0.968609	1	0.858129	1	1	1	1.18625e-13	1	0.81891	0.262854	1	1	1
white	8.04367e-08	0.000140085	0.734787	1	0.0943191	0.0170598	0.12575	0.119882	0.800473	1	1	1	1	1	0.999329	0.949524	0.980422
